# Supplementary material
Source: publisher site journal article supplement (https://www.spandidos-publications.com/8081/downloadSupplementary)
Supplement: Supplementary file 1 [file downloadSupplementary]

## Sheet: 附表3
Table SIII. Unsupervised consensus clustering of 75 cholangiocarcinoma samples into two subtypes based on gene expression.
Sample	Time	Status	Subtype
ICC001G	3.58333	0	SubB
ICC002G	14.25	0	SubA
ICC003G	0.583333	0	SubA
ICC005G	2.08333	1	SubB
ICC006G	6.5	1	SubA
ICC008G	10.0833	1	SubA
ICC009G	11.4167	0	SubA
ICC011G	3.5	1	SubA
ICC012G	0.333333	1	SubB
ICC013G	6.33333	1	SubB
ICC015G	1.33333	0	SubB
ICC016G	12.75	0	SubA
ICC018G	10.5	0	SubB
ICC019G	10.4167	0	SubB
ICC020G	6.41667	1	SubB
ICC021G	3.25	1	SubA
ICC022G	3.58333	1	SubA
ICC023G	1.08333	1	SubB
ICC024G	0.166667	1	SubA
ICC027G	6.33333	1	SubA
ICC028G	4.08333	1	SubA
ICC031G	3.08333	1	SubA
ICC034G	8.33333	0	SubB
ICC037G	0.916667	1	SubB
ICC039G	0.25	1	SubB
ICC040G	5.41667	0	SubB
ICC041G	1.33333	1	SubB
ICC044G	7.33333	1	SubA
ICC046G	0.666667	1	SubB
ICC047G	1.08333	1	SubB
ICC049G	5.75	1	SubA
ICC051G	3.83333	1	SubA
ICC052G	1.75	0	SubB
ICC053G	6.08333	1	SubA
ICC055G	6.41667	0	SubA
ICC056G	3.5	1	SubB
ICC057G	6.83333	0	SubB
ICC058G	1.75	1	SubB
ICC059G	3.08333	1	SubB
ICC061G	1.83333	1	SubB
ICC063G	2.08333	0	SubA
ICC064G	1.41667	1	SubB
ICC065G	0.583333	1	SubB
ICC067G	3.66667	1	SubB
ICC068G	2.08333	1	SubA
ICC071G	1.5	1	SubA
ICC072G	0.833333	1	SubA
ICC073G	2	1	SubA
ICC074G	2.66667	1	SubB
ICC075G	6.08333	0	SubA
ICC077G	1.41667	1	SubB
ICC079G	5.66667	0	SubA
ICC081G	0.333333	1	SubB
ICC082G	1	1	SubB
ICC086G	1	1	SubB
ICC087G	1.91667	1	SubA
ICC091G	4.91667	0	SubA
ICC092G	1.83333	1	SubB
ICC093G	0.0833333	1	SubB
ICC094G	0.5	1	SubB
ICC095G	0.166667	1	SubA
ICC096G	0.25	1	SubB
ICC097G	2.25	1	SubB
ICC098G	4.5	0	SubA
ICC099G	0.583333	1	SubB
ICC104G	3.5	0	SubA
ICC106G	1.5	1	SubA
ICC107G	2.25	1	SubA
ICC110G	2.75	0	SubB
ICC111G	2.5	0	SubB
ICC112G	2.5	0	SubB
ICC113G	0.0833333	1	SubB
ICC116G	1.16667	0	SubB
ICC118G	1.75	0	SubA
ICC120G	0.916667	0	SubA
